# Supplementary material for: Respiratory response to temperature of three populations of Aurelia aurita polyps in northern Europe
Source: PLoS One. 2017 May 17;12(5):e0177913. doi: 10.1371/journal.pone.0177913 (PMC5435318; doi:10.1371/journal.pone.0177913)
Supplement: S1 Dataset — (XLSX) [file pone.0177913.s001.xlsx]

## Sheet: Sheet1
Location	Temperature (°C)	Respiration Rates (nmol/h)	Weight (mg)
southern England	2	10.1024	0.498
southern England	2	10.3462	0.544
southern England	2	10.6547	0.383
southern England	2	7.90822	0.45
southern England	2	13.7593	0.778
southern England	4	12.9592	0.348
southern England	4	15.0821	0.774
southern England	4	15.0821	0.432
southern England	4	10.2639	0.321
southern England	4	12.7721	0.465
southern England	6	10.6127	0.374
southern England	6	7.58673	0.298
southern England	6	9.58495	0.281
southern England	6	11.4971	0.234
southern England	6	9.50724	0.393
southern England	8	9.78702	0.168
southern England	8	12.1189	0.314
southern England	8	16.4921	0.381
southern England	8	15.2254	0.338
southern England	8	14.1699	0.354
southern England	10	34.0664	0.374
southern England	10	28.877	0.298
southern England	10	38.0876	0.281
southern England	10	35.0841	0.234
southern England	10	32.4812	0.393
southern England	12	17.6124	0.375
southern England	12	19.0115	0.224
southern England	12	16.4868	0.379
southern England	12	11.8104	0.2
southern England	12	20.3199	0.411
southern England	14	22.5474	0.419
southern England	14	20.9287	0.292
southern England	14	21.3983	0.604
southern England	14	11.7949	0.32
southern England	16	6.32188	0.304
southern England	16	19.4708	0.562
southern England	16	19.2287	0.646
southern England	16	16.5771	0.506
southern England	16	12.3179	0.401
southern England	18	7.25786	0.43
southern England	18	9.79127	0.354
southern England	18	3.76179	0.171
southern England	18	12.9754	0.628
southern England	18	5.88659	0.216
southern England	20	4.6385	0.24
southern England	20	6.6575	0.4
southern England	20	5.07706	0.287
southern England	20	3.76685	0.267
southern England	20	6.44634	0.351
southern England	22	4.45876	0.251
southern England	22	7.16586	0.228
southern England	22	2.49856	0.248
southern England	22	2.97828	0.233
southern England	22	2.86634	0.179
Scotland	2	6.33867	0.474
Scotland	2	6.82626	0.486
Scotland	2	2.92554	0.228
Scotland	2	1.95036	0.367
Scotland	2	3.90072	0.357
Scotland	2	4.14451	0.324
Scotland	2	2.19415	0.225
Scotland	4	12.0139	0.777
Scotland	4	30.7249	0.924
Scotland	4	9.74242	0.588
Scotland	4	16.7013	0.601
Scotland	4	13.4538	0.578
Scotland	4	15.3095	0.584
Scotland	4	20.6447	1.457
Scotland	4	8.81457	0.266
Scotland	4	8.58261	0.407
Scotland	6	7.14885	0.277
Scotland	6	4.72139	0.199
Scotland	6	10.4653	0.309
Scotland	6	4.27735	0.267
Scotland	6	4.49567	0.205
Scotland	8	13.159	0.274
Scotland	8	11.6812	0.374
Scotland	8	8.72573	0.238
Scotland	8	9.99237	0.285
Scotland	8	12.9479	0.46
Scotland	8	13.7923	0.431
Scotland	8	6.19245	0.297
Scotland	8	9.99237	0.29
Scotland	10	22.1809	0.57
Scotland	10	19.9632	0.534
Scotland	10	22.3755	0.382
Scotland	10	23.2582	0.512
Scotland	10	19.2619	0.416
Scotland	10	15.8195	0.472
Scotland	10	17.6374	0.317
Scotland	10	9.14262	0.31
Scotland	10	10.5048	0.282
Scotland	14	14.5889	0.197
Scotland	14	13.2902	0.186
Scotland	14	15.7021	0.21
Scotland	14	7.53869	0.157
Scotland	14	7.16763	0.132
Scotland	14	19.7822	0.264
Scotland	14	9.02294	0.123
Scotland	16	17.2286	0.526
Scotland	16	13.1291	0.375
Scotland	16	9.74263	0.175
Scotland	16	11.7032	0.307
Scotland	16	10.0991	0.302
Scotland	16	12.0597	0.312
Scotland	16	12.5944	0.293
Scotland	16	4.57376	0.168
Scotland	18	17.4417	0.515
Scotland	18	21.8996	0.856
Scotland	18	18.9848	0.427
Scotland	18	22.071	0.543
Scotland	18	22.2425	0.974
Scotland	18	8.69737	0.226
Scotland	18	19.6706	0.816
Scotland	18	26.3575	1.1
Scotland	20	7.22509	0.423
Scotland	20	5.61479	0.39
Scotland	20	3.13768	0.303
Scotland	20	11.725	0.694
Scotland	20	3.13768	0.365
Scotland	20	3.96338	0.354
Scotland	20	2.8074	0.321
Scotland	20	5.61479	0.397
Scotland	20	6.77078	0.53
Scotland	22	2.54786	0.247
Scotland	22	4.45876	0.432
Scotland	22	1.9109	0.496
Scotland	22	3.02559	0.354
Scotland	22	4.77724	0.362
Scotland	22	2.54786	0.259
Scotland	22	2.7071	0.645
Scotland	22	1.43317	0.434
Scotland	22	8.12131	0.142
Norway	2	8.69535	0.267
Norway	2	14.5464	0.274
Norway	2	6.01361	0.265
Norway	2	10.3044	0.323
Norway	4	12.4892	0.284
Norway	4	8.30315	0.342
Norway	4	7.8487	0.227
Norway	4	12.261	0.292
Norway	4	9.4393	0.193
Norway	4	9.66653	0.37
Norway	4	6.71255	0.478
Norway	6	14.0693	0.281
Norway	6	9.521	0.286
Norway	6	3.30124	0.677
Norway	6	11.7827	0.351
Norway	6	8.38548	0.39
Norway	6	4.96016	0.475
Norway	6	9.78412	0.26
Norway	8	8.96195	0.366
Norway	8	8.02204	0.241
Norway	8	18.2121	0.412
Norway	8	15.8995	0.344
Norway	8	14.0813	0.26
Norway	8	20.3622	0.25
Norway	8	10.4336	0.332
Norway	8	9.49979	0.339
Norway	10	10.1333	0.271
Norway	10	9.37947	0.324
Norway	10	12.8934	0.511
Norway	10	7.50593	0.288
Norway	10	8.01845	0.401
Norway	10	9.14097	0.506
Norway	10	6.30565	0.683
Norway	10	7.19336	0.704
Norway	12	8.39546	0.858
Norway	12	10.3766	0.438
Norway	12	9.672	0.2
Norway	12	7.43647	0.285
Norway	12	7.28463	0.429
Norway	14	8.99564	0.782
Norway	14	10.0805	0.265
Norway	14	16.3886	0.386
Norway	14	12.3069	0.495
Norway	14	10.8226	0.271
Norway	14	13.9767	0.756
Norway	14	10.069	0.775
Norway	14	11.7318	0.403
Norway	14	11.3792	0.646
Norway	14	13.6056	0.813
Norway	16	6.773	0.503
Norway	16	15.3764	0.376
Norway	16	13.424	0.422
Norway	16	17.1918	0.265
Norway	16	17.1918	0.314
Norway	16	11.294	0.411
Norway	16	8.80904	0.565
Norway	16	8.02066	0.381
Norway	18	7.49576	0.324
Norway	18	15.4877	0.704
Norway	18	12.1337	0.451
Norway	18	9.65054	0.457
Norway	18	10.4403	0.414
Norway	18	14.3726	0.758
Norway	18	16.2278	0.26
Norway	18	9.03515	0.338
Norway	18	12.2264	0.308
Norway	20	0.737161	0.379
Norway	20	5.06602	0.329
Norway	20	3.55082	0.398
Norway	20	8.60524	0.464
Norway	20	9.10066	0.332
Norway	20	11.5108	0.536
Norway	22	3.23574	0.215
Norway	22	7.91549	0.304
Norway	22	8.82512	0.334
Norway	22	11.027	0.672
Norway	22	11.6528	0.618
Norway	22	10.7013	0.328
Norway	22	9.81988	0.462
Norway	22	8.06823	0.295
Norway	22	18.4189	0.735
