# Supplementary material for: Respiratory response to temperature of three populations of Aurelia aurita polyps in northern Europe
Source: PLoS One. 2017 May 17;12(5):e0177913. doi: 10.1371/journal.pone.0177913 (PMC5435318; doi:10.1371/journal.pone.0177913)
Supplement: S2 Dataset — (XLSX) [file pone.0177913.s002.xlsx]

## Sheet: post hoc multiple comparison
Population	Temperatures	Mean Differences	95% Confidence Interval of Difference	Adjusted P Value
Southern England	2 vs. 4	-2678	-9.448 to 4.092	0.9551
Southern England	2 vs. 6	0.7962	-5.974 to 7.566	>0.9999
Southern England	2 vs. 8	-3005	-9.775 to 3.766	0.9093
Southern England	2 vs. 10	-23.17	-29.94 to -16.39	<0.0001
Southern England	2 vs. 12	-6494	-13.26 to 0.2763	0.0702
Southern England	2 vs. 14	-8613	-15.79 to -1.432	0.008
Southern England	2 vs. 16	-4229	-11 to 2.541	0.5688
Southern England	2 vs. 18	2619	-4.151 to 9.39	0.9611
Southern England	2 vs. 20	5237	-1.533 to 12.01	0.2669
Southern England	2 vs. 22	6.56	-0.2099 to 13.33	0.0648
Southern England	4 vs. 6	3474	-3.296 to 10.24	0.8049
Southern England	4 vs. 8	-0.3268	-7.097 to 6.443	>0.9999
Southern England	4 vs. 10	-20.49	-27.26 to -13.72	<0.0001
Southern England	4 vs. 12	-3816	-10.59 to 2.954	0.7045
Southern England	4 vs. 14	-5935	-13.12 to 1.246	0.1895
Southern England	4 vs. 16	-1552	-8.322 to 5.219	0.9993
Southern England	4 vs. 18	5297	-1.473 to 12.07	0.2526
Southern England	4 vs. 20	7915	1.144 to 14.68	0.0107
Southern England	4 vs. 22	9238	2.468 to 16.01	0.0015
Southern England	6 vs. 8	-3801	-10.57 to 2.969	0.7094
Southern England	6 vs. 10	-23.96	-30.73 to -17.19	<0.0001
Southern England	6 vs. 12	-7.29	-14.06 to -0.5199	0.0255
Southern England	6 vs. 14	-9409	-16.59 to -2.228	0.0026
Southern England	6 vs. 16	-5026	-11.8 to 1.745	0.321
Southern England	6 vs. 18	1823	-4.947 to 8.593	0.9974
Southern England	6 vs. 20	4441	-2.33 to 11.21	0.4986
Southern England	6 vs. 22	5764	-1.006 to 12.53	0.1596
Southern England	8 vs. 10	-20.16	-26.93 to -13.39	<0.0001
Southern England	8 vs. 12	-3489	-10.26 to 3.281	0.8008
Southern England	8 vs. 14	-5609	-12.79 to 1.572	0.2547
Southern England	8 vs. 16	-1225	-7.995 to 5.545	>0.9999
Southern England	8 vs. 18	5624	-1.146 to 12.39	0.1843
Southern England	8 vs. 20	8241	1.471 to 15.01	0.0067
Southern England	8 vs. 22	9565	2.795 to 16.34	0.0009
Southern England	10 vs. 12	16.67	9.901 to 23.44	<0.0001
Southern England	10 vs. 14	14.55	7.371 to 21.73	<0.0001
Southern England	10 vs. 16	18.94	12.17 to 25.71	<0.0001
Southern England	10 vs. 18	25.78	19.01 to 32.55	<0.0001
Southern England	10 vs. 20	28.4	21.63 to 35.17	<0.0001
Southern England	10 vs. 22	29.73	22.96 to 36.5	<0.0001
Southern England	12 vs. 14	-2119	-9.3 to 5.062	0.9945
Southern England	12 vs. 16	2265	-4.506 to 9.035	0.9859
Southern England	12 vs. 18	9113	2.343 to 15.88	0.0018
Southern England	12 vs. 20	11.73	4.961 to 18.5	<0.0001
Southern England	12 vs. 22	13.05	6.284 to 19.82	<0.0001
Southern England	14 vs. 16	4384	-2.797 to 11.56	0.601
Southern England	14 vs. 18	11.23	4.052 to 18.41	0.0002
Southern England	14 vs. 20	13.85	6.669 to 21.03	<0.0001
Southern England	14 vs. 22	15.17	7.993 to 22.35	<0.0001
Southern England	16 vs. 18	6849	0.07853 to 13.62	0.0453
Southern England	16 vs. 20	9466	2.696 to 16.24	0.001
Southern England	16 vs. 22	10.79	4.02 to 17.56	0.0001
Southern England	18 vs. 20	2617	-4.153 to 9.388	0.9613
Southern England	18 vs. 22	3941	-2.829 to 10.71	0.6645
Southern England	20 vs. 22	1324	-5.447 to 8.094	0.9998
Scotland	2 vs. 4	-11.07	-17.98 to -4.157	<0.0001
Scotland	2 vs. 6	-2181	-10.21 to 5.851	0.9964
Scotland	2 vs. 8	-6.77	-13.87 to 0.3293	0.0742
Scotland	2 vs. 10	-13.75	-20.67 to -6.841	<0.0001
Scotland	2 vs. 14	-8402	-15.73 to -1.069	0.0127
Scotland	2 vs. 16	-7351	-14.45 to -0.2518	0.0365
Scotland	2 vs. 18	-15.63	-22.73 to -8.531	<0.0001
Scotland	2 vs. 20	-1515	-8.428 to 5.398	0.9993
Scotland	2 vs. 22	0.5368	-6.376 to 7.45	>0.9999
Scotland	4 vs. 6	8888	1.237 to 16.54	0.0108
Scotland	4 vs. 8	4.3	-2.366 to 10.97	0.5278
Scotland	4 vs. 10	-2684	-9.15 to 3.783	0.9359
Scotland	4 vs. 14	2668	-4.245 to 9.581	0.9587
Scotland	4 vs. 16	3719	-2.947 to 10.38	0.718
Scotland	4 vs. 18	-4561	-11.23 to 2.105	0.4425
Scotland	4 vs. 20	9555	3.088 to 16.02	0.0003
Scotland	4 vs. 22	11.61	5.14 to 18.07	<0.0001
Scotland	6 vs. 8	-4589	-12.41 to 3.231	0.6568
Scotland	6 vs. 10	-11.57	-19.22 to -3.921	0.0002
Scotland	6 vs. 14	-6.22	-14.25 to 1.812	0.2705
Scotland	6 vs. 16	-5.17	-12.99 to 2.65	0.4925
Scotland	6 vs. 18	-13.45	-21.27 to -5.629	<0.0001
Scotland	6 vs. 20	0.6664	-6.985 to 8.318	>0.9999
Scotland	6 vs. 22	2718	-4.933 to 10.37	0.9757
Scotland	8 vs. 10	-6984	-13.65 to -0.3181	0.0326
Scotland	8 vs. 14	-1632	-8.731 to 5.468	0.999
Scotland	8 vs. 16	-0.5811	-7.44 to 6.278	>0.9999
Scotland	8 vs. 18	-8.86	-15.72 to -2.002	0.0027
Scotland	8 vs. 20	5255	-1.41 to 11.92	0.2481
Scotland	8 vs. 22	7307	0.6415 to 13.97	0.0207
Scotland	10 vs. 14	5352	-1.561 to 12.26	0.2709
Scotland	10 vs. 16	6402	-0.263 to 13.07	0.07
Scotland	10 vs. 18	-1877	-8.542 to 4.789	0.9953
Scotland	10 vs. 20	12.24	5.772 to 18.7	<0.0001
Scotland	10 vs. 22	14.29	7.824 to 20.76	<0.0001
Scotland	14 vs. 16	1.05	-6.049 to 8.15	>0.9999
Scotland	14 vs. 18	-7229	-14.33 to -0.1294	0.0426
Scotland	14 vs. 20	6887	-0.02625 to 13.8	0.0517
Scotland	14 vs. 22	8939	2.026 to 15.85	0.0027
Scotland	16 vs. 18	-8279	-15.14 to -1.421	0.0068
Scotland	16 vs. 20	5836	-0.8293 to 12.5	0.1366
Scotland	16 vs. 22	7888	1.223 to 14.55	0.0087
Scotland	18 vs. 20	14.12	7.45 to 20.78	<0.0001
Scotland	18 vs. 22	16.17	9.502 to 22.83	<0.0001
Scotland	20 vs. 22	2052	-4.415 to 8.518	0.9888
Norway	2 vs. 4	0.3582	-6.631 to 7.348	>0.9999
Norway	2 vs. 6	1061	-5.929 to 8.05	>0.9999
Norway	2 vs. 8	-3294	-10.12 to 3.534	0.8748
Norway	2 vs. 10	1069	-5.76 to 7.897	>0.9999
Norway	2 vs. 12	1257	-6.224 to 8.737	>0.9999
Norway	2 vs. 14	-2046	-8.643 to 4.551	0.9937
Norway	2 vs. 16	-2.37	-9.199 to 4.458	0.9852
Norway	2 vs. 18	-2007	-8.708 to 4.694	0.9952
Norway	2 vs. 20	3461	-3.737 to 10.66	0.877
Norway	2 vs. 22	-0.07292	-6.774 to 6.628	>0.9999
Norway	4 vs. 6	0.7026	-5.258 to 6.663	>0.9999
Norway	4 vs. 8	-3653	-9.424 to 2.119	0.5773
Norway	4 vs. 10	0.7104	-5.061 to 6.482	>0.9999
Norway	4 vs. 12	0.8986	-5.631 to 7.428	>0.9999
Norway	4 vs. 14	-2404	-7.9 to 3.091	0.929
Norway	4 vs. 16	-2729	-8.5 to 3.043	0.8881
Norway	4 vs. 18	-2365	-7.985 to 3.255	0.9443
Norway	4 vs. 20	3103	-3.101 to 9.307	0.848
Norway	4 vs. 22	-0.4311	-6.051 to 5.189	>0.9999
Norway	6 vs. 8	-4355	-10.13 to 1.416	0.3164
Norway	6 vs. 10	0.007875	-5.763 to 5.779	>0.9999
Norway	6 vs. 12	0.196	-6.334 to 6.726	>0.9999
Norway	6 vs. 14	-3107	-8.602 to 2.389	0.727
Norway	6 vs. 16	-3431	-9.202 to 2.34	0.6641
Norway	6 vs. 18	-3068	-8.688 to 2.552	0.7664
Norway	6 vs. 20	2401	-3.804 to 8.605	0.968
Norway	6 vs. 22	-1134	-6.753 to 4.486	0.9998
Norway	8 vs. 10	4363	-1.213 to 9.939	0.267
Norway	8 vs. 12	4551	-1.806 to 10.91	0.3928
Norway	8 vs. 14	1248	-4.041 to 6.538	0.9994
Norway	8 vs. 16	0.924	-4.652 to 6.5	>0.9999
Norway	8 vs. 18	1287	-4.131 to 6.706	0.9993
Norway	8 vs. 20	6756	0.7332 to 12.78	0.0156
Norway	8 vs. 22	3221	-2.197 to 8.64	0.6641
Norway	10 vs. 12	0.1881	-6.169 to 6.545	>0.9999
Norway	10 vs. 14	-3115	-8.404 to 2.175	0.6766
Norway	10 vs. 16	-3439	-9.015 to 2.137	0.614
Norway	10 vs. 18	-3076	-8.494 to 2.343	0.7223
Norway	10 vs. 20	2393	-3.63 to 8.415	0.9618
Norway	10 vs. 22	-1142	-6.56 to 4.277	0.9998
Norway	12 vs. 14	-3303	-9.411 to 2.805	0.7764
Norway	12 vs. 16	-3627	-9.984 to 2.73	0.7161
Norway	12 vs. 18	-3264	-9.484 to 2.956	0.8063
Norway	12 vs. 20	2205	-4.548 to 8.957	0.9907
Norway	12 vs. 22	-1.33	-7.55 to 4.89	0.9997
Norway	14 vs. 16	-0.3242	-5.614 to 4.965	>0.9999
Norway	14 vs. 18	0.03912	-5.085 to 5.163	>0.9999
Norway	14 vs. 20	5507	-0.2511 to 11.27	0.0732
Norway	14 vs. 22	1973	-3.15 to 7.097	0.969
Norway	16 vs. 18	0.3633	-5.055 to 5.782	>0.9999
Norway	16 vs. 20	5832	-0.1908 to 11.85	0.0661
Norway	16 vs. 22	2297	-3.121 to 7.716	0.9416
Norway	18 vs. 20	5468	-0.409 to 11.35	0.0909
Norway	18 vs. 22	1934	-3.323 to 7.191	0.9775
Norway	20 vs. 22	-3534	-9.411 to 2.343	0.6489
